# Supplementary material for: Mathematical Modeling of the Dynamics of Shoot-Root Interactions and Resource Partitioning in Plant Growth
Source: PubMed Central journal article supplement (PMC4495989; doi:10.1371/journal.pone.0127905), 2015-07-08
Supplement: pone.0127905.s004.pdf [file pone.0127905.s004.pdf]

**Table S1** Fixed parameters of the mathematical model

| Category               | Parameter  | Value                 | Units                                                          | Source               |
|------------------------|------------|-----------------------|----------------------------------------------------------------|----------------------|
| Leaf thickness         | $th_{max}$ | 0.084                 | cm                                                             | This study           |
|                        | $th_{min}$ | 0.026                 | cm                                                             | This study           |
|                        | $m_{th}$   | 592.0194              | $\mu \text{ mol m}^{-2} \text{ s}^{-1}$                        | This study           |
| Critical surface       | $S_c$      | 22.445                | $\text{cm}^2$                                                  | This study           |
| Phloem tube length     | $\ell_1$   | 8.999                 | cm                                                             | This study           |
|                        | $\ell_2$   | 0.321                 | cm                                                             | This study           |
|                        | $m_L$      | 0.192                 | $\text{cm}^3$                                                  | This study           |
| Phloem tube number     | $n_{max}$  | 7494.676              | dimension-less                                                 | This study           |
|                        | $n_{min}$  | 13.028                | dimension-less                                                 | This study           |
|                        | $a_n$      | 9677.612              | $(\text{cm}^3)^2$                                              | This study           |
|                        | $u_n$      | 0                     | $\text{cm}^3$                                                  | This study           |
| Phloem tube resistance | $\eta$     | 108.0                 | $\text{g cm}^{-1} \text{ h}^{-1}$                              | Minchin et al., 1993 |
|                        | $T$        | 295.0                 | K                                                              | This study           |
|                        | $R$        | $1.078 \cdot 10^{15}$ | $\text{g cm}^2 \text{ h}^{-2} \text{ mol}^{-1} \text{ K}^{-1}$ | Gas constant         |
| Water density          | $d_p$      | 0.9250                | $\text{cm}^3 \text{ H}_2\text{O cm}^{-3} \text{ plant}$        | This study           |

|                  |                                 |                    |                                                                  |                          |
|------------------|---------------------------------|--------------------|------------------------------------------------------------------|--------------------------|
| Soil volume      | $V_{\text{soil}}$               | 0.135              | $\ell$                                                           | This study               |
| Phosphate uptake | $U_{\text{max}} S_{\text{max}}$ | 33.297             | $\mu\text{g h}^{-1}$                                             | This study               |
|                  | $m_U$                           | $1.479 \cdot 10^4$ | $\mu\text{g l}^{-1}$                                             | This study               |
|                  | $m_{\text{as}}$                 | 0.160              | $\text{cm}^3$                                                    | This study               |
| Respiration      | $c_l^{\text{su}}$               | 0.035              | $\mu\text{g sugar } \mu\text{g}^{-1} \text{ sugar loaded}$       | Cannell & Thornley, 2000 |
|                  | $c_e$                           | 0.053              | $\mu\text{g sugar } \mu\text{g}^{-1} \text{ phosphate taken up}$ | Cannell & Thornley, 2000 |
