# Supplementary material for: Mathematical Modeling of the Dynamics of Shoot-Root Interactions and Resource Partitioning in Plant Growth
Source: PubMed Central journal article supplement (PMC4495989; doi:10.1371/journal.pone.0127905), 2015-07-08
Supplement: pone.0127905.s005.pdf [file pone.0127905.s005.pdf]

**Table S2.** Fitted parameters of the mathematical model.

| Category                       | Parameter                      | Units                                              | Initial value      | Biological interval                    | Fitted Value       | Source                          |
|--------------------------------|--------------------------------|----------------------------------------------------|--------------------|----------------------------------------|--------------------|---------------------------------|
| <i>Growth</i>                  | $g_{max}^{sh}$                 | $\text{cm}^3 \text{h}^{-1}$                        | 0.203              | (0.183, 0.223)                         | 0.199              | This study                      |
|                                | $g_{max}^r$                    | $\text{cm}^3 \text{h}^{-1}$                        | 0.084              | (0.076, 0.092)                         | 0.088              | This study                      |
|                                | $m_{g,sh}$                     | $\text{cm}^3$                                      | 19.349             | (17.414, 21.284)                       | 21.053             | This study                      |
|                                | $m_{g,r}$                      | $\text{cm}^3$                                      | 7.983              | (7.185, 8.782)                         | 7.817              | This study                      |
|                                | $a_{g,sh,su} = a_{g,r,su}$     | $(\mu\text{g cm}^{-3})^2$                          | 1.372              | (1.234, 1.509)                         | 1.366              | This study                      |
|                                | $a_{g,sh,ph} = a_{g,r,ph}$     | $(\mu\text{g cm}^{-3})^2$                          | $6.304 \cdot 10^4$ | $(5.674 \cdot 10^4, 6.935 \cdot 10^4)$ | $6.845 \cdot 10^4$ | This study                      |
|                                | $C_{su,gr}^{sh} = C_{su,gr}^r$ | $\mu\text{g cm}^{-3}$                              | 360.415            | (324.373, 396.456)                     | 324.389            | This study                      |
| $C_{ph,gr}^{sh} = C_{su,gr}^r$ | $\mu\text{g cm}^{-3}$          | 69.693                                             | (62.724, 76.663)   | 76.038                                 | This study         |                                 |
| <i>Photosynthesis</i>          | $P_{max}$                      | $\text{mol CO}_2$<br>$\text{m}^{-2} \text{s}^{-1}$ | 22.700             | (20.000, 55.000)                       | 52.230             | Steven Adams<br>(personal com.) |

| Category    | Parameter                  | Units                                                               | Initial value      | Biological interval                       | Fitted Value       | Source                          |
|-------------|----------------------------|---------------------------------------------------------------------|--------------------|-------------------------------------------|--------------------|---------------------------------|
|             | $\alpha$                   | $\mu \text{ mol CO}_2 \text{ (J PAR)}^{-1}$                         | 0.055              | (0.044, 0.065)                            | 0.049              | Steven Adams<br>(personal com.) |
|             | $m_{F,ph}$                 | $\mu \text{ g cm}^{-3}$                                             | 100.000            | (30.000, 350.000)                         | 47.806             | This study                      |
|             | $s_{F,st}$                 | $(\mu \text{ g cm}^{-3})^2$                                         | $2.250 \cdot 10^8$ | $(2.250 \cdot 10^6, 2.250 \cdot 10^{10})$ | $2.250 \cdot 10^8$ | This study                      |
|             | $sd_{F,st}$                | dimensionless                                                       | 0.010              | (0.001, 0.200)                            | 0.182              | This study                      |
|             | $s_{F,su}$                 | $(\mu \text{ g cm}^{-3})^2$                                         | $4.225 \cdot 10^7$ | $(4.225 \cdot 10^5, 4.225 \cdot 10^9)$    | $4.227 \cdot 10^7$ | This study                      |
|             | $sd_{F,su}$                | dimensionless                                                       | 0.010              | (0.0001, 1.000)                           | 0.161              | This study                      |
| Respiration | $m_{R,1}^{sh} = m_{R,1}^r$ | $\mu \text{ g cm}^{-3} \text{ h}^{-1}$                              | 33.333             | (10.000, 66.667)                          | 48.273             | Rasse & Tocquin<br>(2006)       |
|             | $m_{R,2}^{sh} = m_{R,2}^r$ | $\mu \text{ g cm}^{-3} \text{ h}^{-1} (\mu \text{ g cm}^{-3})^{-1}$ | 0.085              | (0.026, 0.255)                            | 0.254              | Rasse & Tocquin<br>(2006)       |
|             | $g_R^{sh} = g_R^r =: g_R$  | $\mu \text{ g cm}^{-3}$                                             | $8.070 \cdot 10^3$ | $(7.263 \cdot 10^3, 8.877 \cdot 10^3)$    | $8.548 \cdot 10^3$ | Amthor (2000)                   |

| Category                          | Parameter          | Units                                               | Initial value         | Biological interval                          | Fitted Value          | Source                                  |
|-----------------------------------|--------------------|-----------------------------------------------------|-----------------------|----------------------------------------------|-----------------------|-----------------------------------------|
| <i>Phloem</i>                     | $r$                | cm                                                  | $5.0 \cdot 10^{-3}$   | $(5.000 \cdot 10^{-4}, 5.000 \cdot 10^{-2})$ | $5.536 \cdot 10^{-3}$ | Sheehy <i>et al.</i> , 1995             |
| <i>Sugar anabolism</i>            | $\theta_{su}^{sh}$ | $\mu\text{g cm}^{-3}$                               | $7.740 \cdot 10^4$    | $(6.966 \cdot 10^4, 8.514 \cdot 10^4)$       | $7.047 \cdot 10^4$    | Rains, 1976                             |
|                                   | $\theta_{su}^r$    | $\mu\text{g cm}^{-3}$                               | $7.954 \cdot 10^4$    | $(7.158 \cdot 10^4, 8.749 \cdot 10^4)$       | $7.165 \cdot 10^4$    | Rains, 1976                             |
| <i>Transpiration</i>              | $E_d$              | $\text{mol H}_2\text{O cm}^{-2}$<br>$\text{h}^{-1}$ | $1.440 \cdot 10^{-4}$ | $(1.296 \cdot 10^{-4}, 1.584 \cdot 10^{-4})$ | $1.323 \cdot 10^{-4}$ | Lambers <i>et al.</i> , 1998            |
|                                   | $E_n$              | $\text{mol H}_2\text{O cm}^{-2}$<br>$\text{h}^{-1}$ | $1.152 \cdot 10^{-4}$ | $(1.037 \cdot 10^{-4}, 1.267 \cdot 10^{-4})$ | $1.038 \cdot 10^{-4}$ | Zeeman (personal com.): $0.8 \cdot E_d$ |
| <i>Phosphate transport</i>        | $p_{max}^r$        | dimensionless                                       | 0.05                  | (0.010, 1.000)                               | 0.061                 | This study                              |
|                                   | $p_{max}^{sh}$     | dimensionless                                       | 0.070                 | (0.010, 1.000)                               | 0.052                 | This study                              |
| <i>Target sugar concentration</i> | $C_{su,t}^{sh}$    | $\mu\text{g cm}^{-3}$                               | $1.0 \cdot 10^3$      | $(5.000 \cdot 10^2, 2.500 \cdot 10^3)$       | $8.693 \cdot 10^2$    | This study                              |

| Category      | Parameter    | Units                     | Initial value         | Biological interval                       | Fitted Value          | Source     |
|---------------|--------------|---------------------------|-----------------------|-------------------------------------------|-----------------------|------------|
| <i>Starch</i> | $s_{st}$     | $(\mu\text{g cm}^{-3})^2$ | $6.400 \cdot 10^{11}$ | $(6.400 \cdot 10^9, 6.400 \cdot 10^{13})$ | $6.400 \cdot 10^{11}$ | This study |
|               | $sd_{st}$    | dimensionless             | 0.010                 | (0.001, 0.200)                            | 0.142                 | This study |
|               | $a_{\rho,1}$ | $(\mu\text{g cm}^{-3})^2$ | $2.250 \cdot 10^6$    | $(2.250 \cdot 10^4, 2.250 \cdot 10^8)$    | $2.276 \cdot 10^6$    | This study |
|               | $s_{\rho,2}$ | $(\mu\text{g cm}^{-3})^2$ | 250.0                 | (2.500, 25000.000)                        | 105.566               | This study |
|               | $s_{\rho,3}$ | $(\mu\text{g cm}^{-3})^2$ | 350.0                 | $(3.500, 3.500 \cdot 10^4)$               | $2.257 \cdot 10^4$    | This study |
|               | $k_1$        | $h^{-1}$                  | 0.005                 | (0.001, 0.015)                            | 0.011                 | This study |
|               | $k_2$        | $h^{-1}$                  | 0.010                 | (0.001, 0.030)                            | 0.020                 | This study |
|               | $k_3$        | $h^{-1}$                  | 0.020                 | (0.002, 0.060)                            | 0.014                 | This study |
