# Supplementary material for: Mathematical Modeling of the Dynamics of Shoot-Root Interactions and Resource Partitioning in Plant Growth
Source: PubMed Central journal article supplement (PMC4495989; doi:10.1371/journal.pone.0127905), 2015-07-08
Supplement: pone.0127905.s006.pdf [file pone.0127905.s006.pdf]

**Table S3** Parameter values of Thornley's model (resulting from a fit to our experimental data)

| Parameter     | Description                  | Units                                                           | Initial value         | Fitted Value          | Interval                                     | Source                                       |
|---------------|------------------------------|-----------------------------------------------------------------|-----------------------|-----------------------|----------------------------------------------|----------------------------------------------|
| $k_G^s$       | Shoot growth rate            | $(\text{g su/g FW})^{-1} (\text{g Pi/g FW})^{-1} \text{d}^{-1}$ | $2.321 \cdot 10^5$    | $2.303 \cdot 10^5$    | $(5.802 \cdot 10^4, 9.283 \cdot 10^5)$       | This study                                   |
| $k_G^r$       | Root growth rate             | $(\text{g su/g FW})^{-1} (\text{g Pi/g FW})^{-1} \text{d}^{-1}$ | $2.771 \cdot 10^5$    | $2.869 \cdot 10^5$    | $(6.928 \cdot 10^4, 1.108 \cdot 10^6)$       | This study                                   |
| $k_{lit}$     | Litter production parameter  | $\text{d}^{-1}$                                                 | $8.557 \cdot 10^{-3}$ | $8.597 \cdot 10^{-3}$ | $(2.139 \cdot 10^{-3}, 3.423 \cdot 10^{-2})$ | This study                                   |
| $K_{Mit}$     | Litter production parameter  | g                                                               | 47.439                | 56.926                | (11.860,189.754)                             | This study                                   |
| $k_C S_{max}$ | Photosynthesis rate          | $\text{g su d}^{-1}$                                            | 1.0745                | 1.047                 | (0.269,4.298)                                | Steve Adams<br>(Personal communications)     |
| $K_{Ms}$      |                              | g                                                               | 8.225                 | 6.839                 | (2.056,32.902)                               | Arbitrary                                    |
| $K_{Mr}$      |                              | g                                                               | 0.192                 | 0.205                 | $(4.800 \cdot 10^{-2}, 0.768)$               | This study                                   |
| $J_C$         | Carbon production inhibition | $\text{g su (g FW)}^{-1}$                                       | $4.0 \cdot 10^{-3}$   | $8.676 \cdot 10^{-5}$ | $(4.0 \cdot 10^{-6}, 4.0)$                   | Arbitrary                                    |
| $q$           | scaling parameter            | dimensionless                                                   | 1                     | 1                     | 1                                            | Thornley (1998b)                             |
| $\rho_C$      | Carbon transport resistance  | $(\text{g FW})^{q-1} \text{d}$                                  | 0.05                  | 0.0207                | $(1.250 \cdot 10^{-2}, 0.200)$               | Arbitrary                                    |
| $f_C$         | Anabolism                    | $\text{g su (g FW)}^{-1}$                                       | $2.625 \cdot 10^{-2}$ | $2.454 \cdot 10^{-2}$ | $(6.563 \cdot 10^{-3}, 0.105)$               | $1.125 \text{ g C}_6\text{H}_{12}\text{O}_6$ |

|          |                                 |                                             |                       |                       |                                              |                                          |
|----------|---------------------------------|---------------------------------------------|-----------------------|-----------------------|----------------------------------------------|------------------------------------------|
|          |                                 |                                             |                       |                       |                                              | per g of dry weight                      |
| $k_P$    | Uptake rate max                 | $\text{g d}^{-1}$                           | $9.495 \cdot 10^{-4}$ | $8.579 \cdot 10^{-4}$ | $(2.374 \cdot 10^{-4}, 3.798 \cdot 10^{-3})$ | This study                               |
| $J_P$    | Phosphate production inhibition | $\text{g Pi (g FW)}^{-1}$                   | $2.942 \cdot 10^{-2}$ | 0.429                 | $(2.942 \cdot 10^{-5}, 29.420)$              | This study                               |
| $\rho_P$ | Phosphate transport resistance  | $(\text{g FW})^{q-1} \text{d}$              | 1                     | 0.381                 | (0.25,4)                                     | Thornley (1995)                          |
| $f_P$    | Anabolism                       | $\text{g Pi (g FW)}^{-1}$                   | 0                     | 0                     | 0                                            |                                          |
| $k_{CL}$ |                                 | $\mu\text{mol photons m}^{-2}\text{s}^{-1}$ | 397.577               | 402.807               | $(99.394, 1.590 \cdot 10^3)$                 | Steve Adams<br>(Personal communications) |
| $k_{PR}$ |                                 | $\mu \text{ g Pi l}^{-1}$                   | $1.802 \cdot 10^4$    | $1.955 \cdot 10^4$    | $(4.505 \cdot 10^3, 7.208 \cdot 10^4)$       | This study                               |
